# Supplementary material
Source: Springer Nature journal article supplement (https://www.springermedizin.de/resource/supplementary/12885_2007_819_MOESM3_ESM.pdf/9470408)

**Figure 3**

(a) 14-3-3  $\zeta$

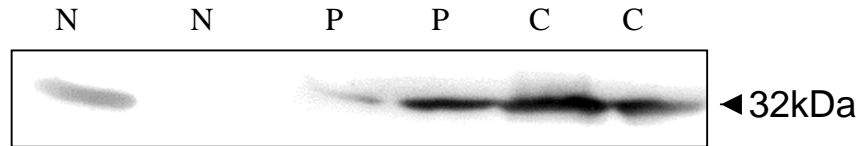

(b)  $\alpha$ -Tubulin

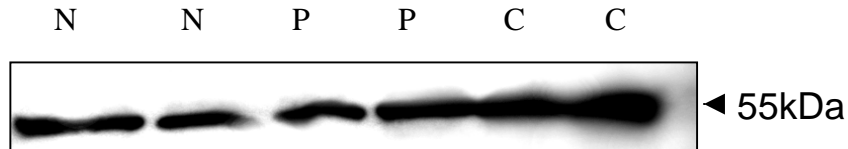

Supplement: MOESM3 [file 9470408]
